# Supplementary material
Source: PubMed Central journal article supplement (PMC3948094)

# Cytogenetic Prognostication within Medulloblastoma Subgroups

Shih, Northcott, Remke et al.

Data Supplement and Appendix

Figure 1

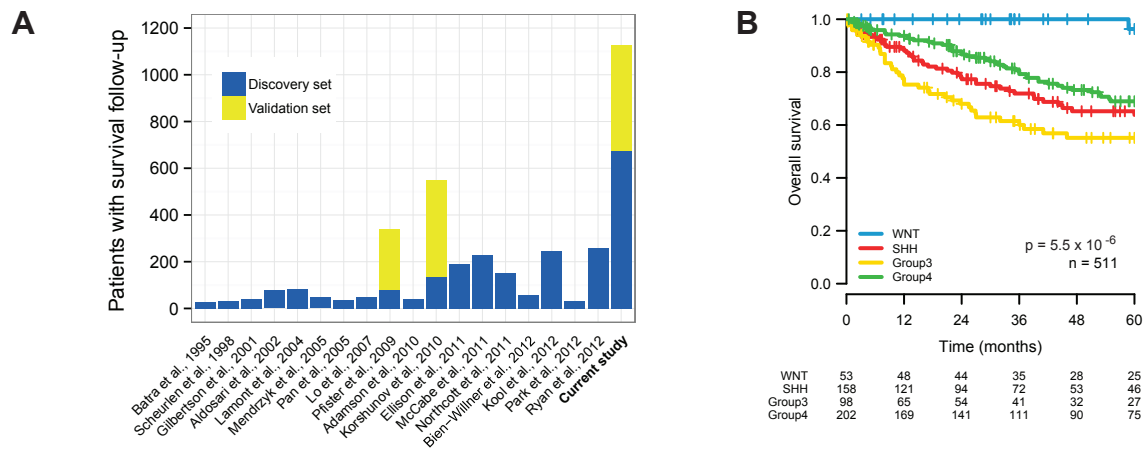

Figure 2

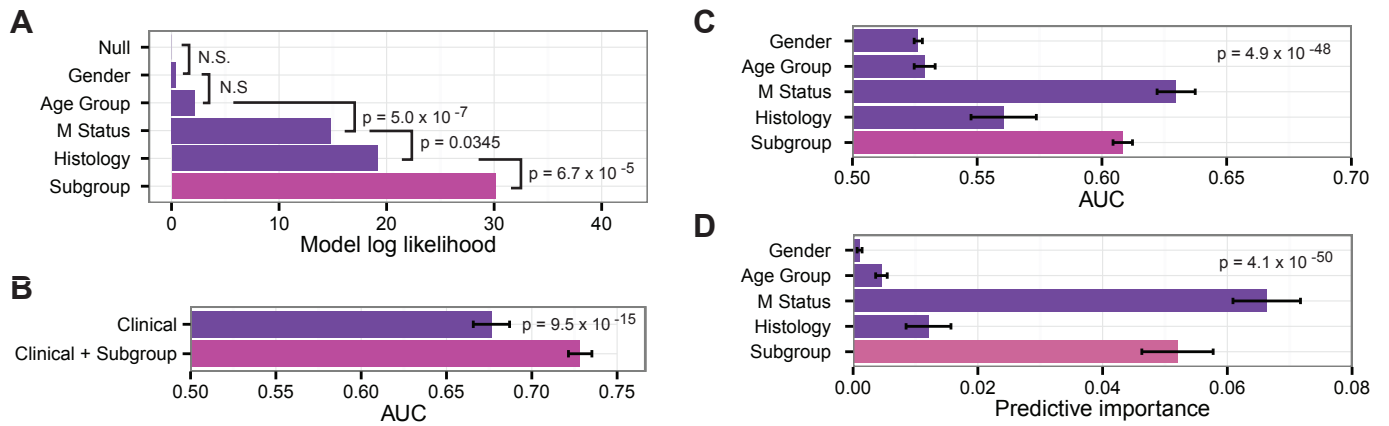

Supplement: supp_JCO.2013.50.9539_DS2_JCO.2013.50.9539.pdf [file supp_JCO.2013.50.9539_DS2_JCO.2013.50.9539.pdf]
